# Supplementary material
Source: Copernicus journal article supplement (doi:10.5194/egqsj-21-5-1970)

Pollen- und Sporendiagramm des Profils „Keller I“ Weichsel-Frühglazial.

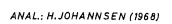

Supplement: Supplementary file 1 [file egqsj-21-5-1970-supplement.zip]

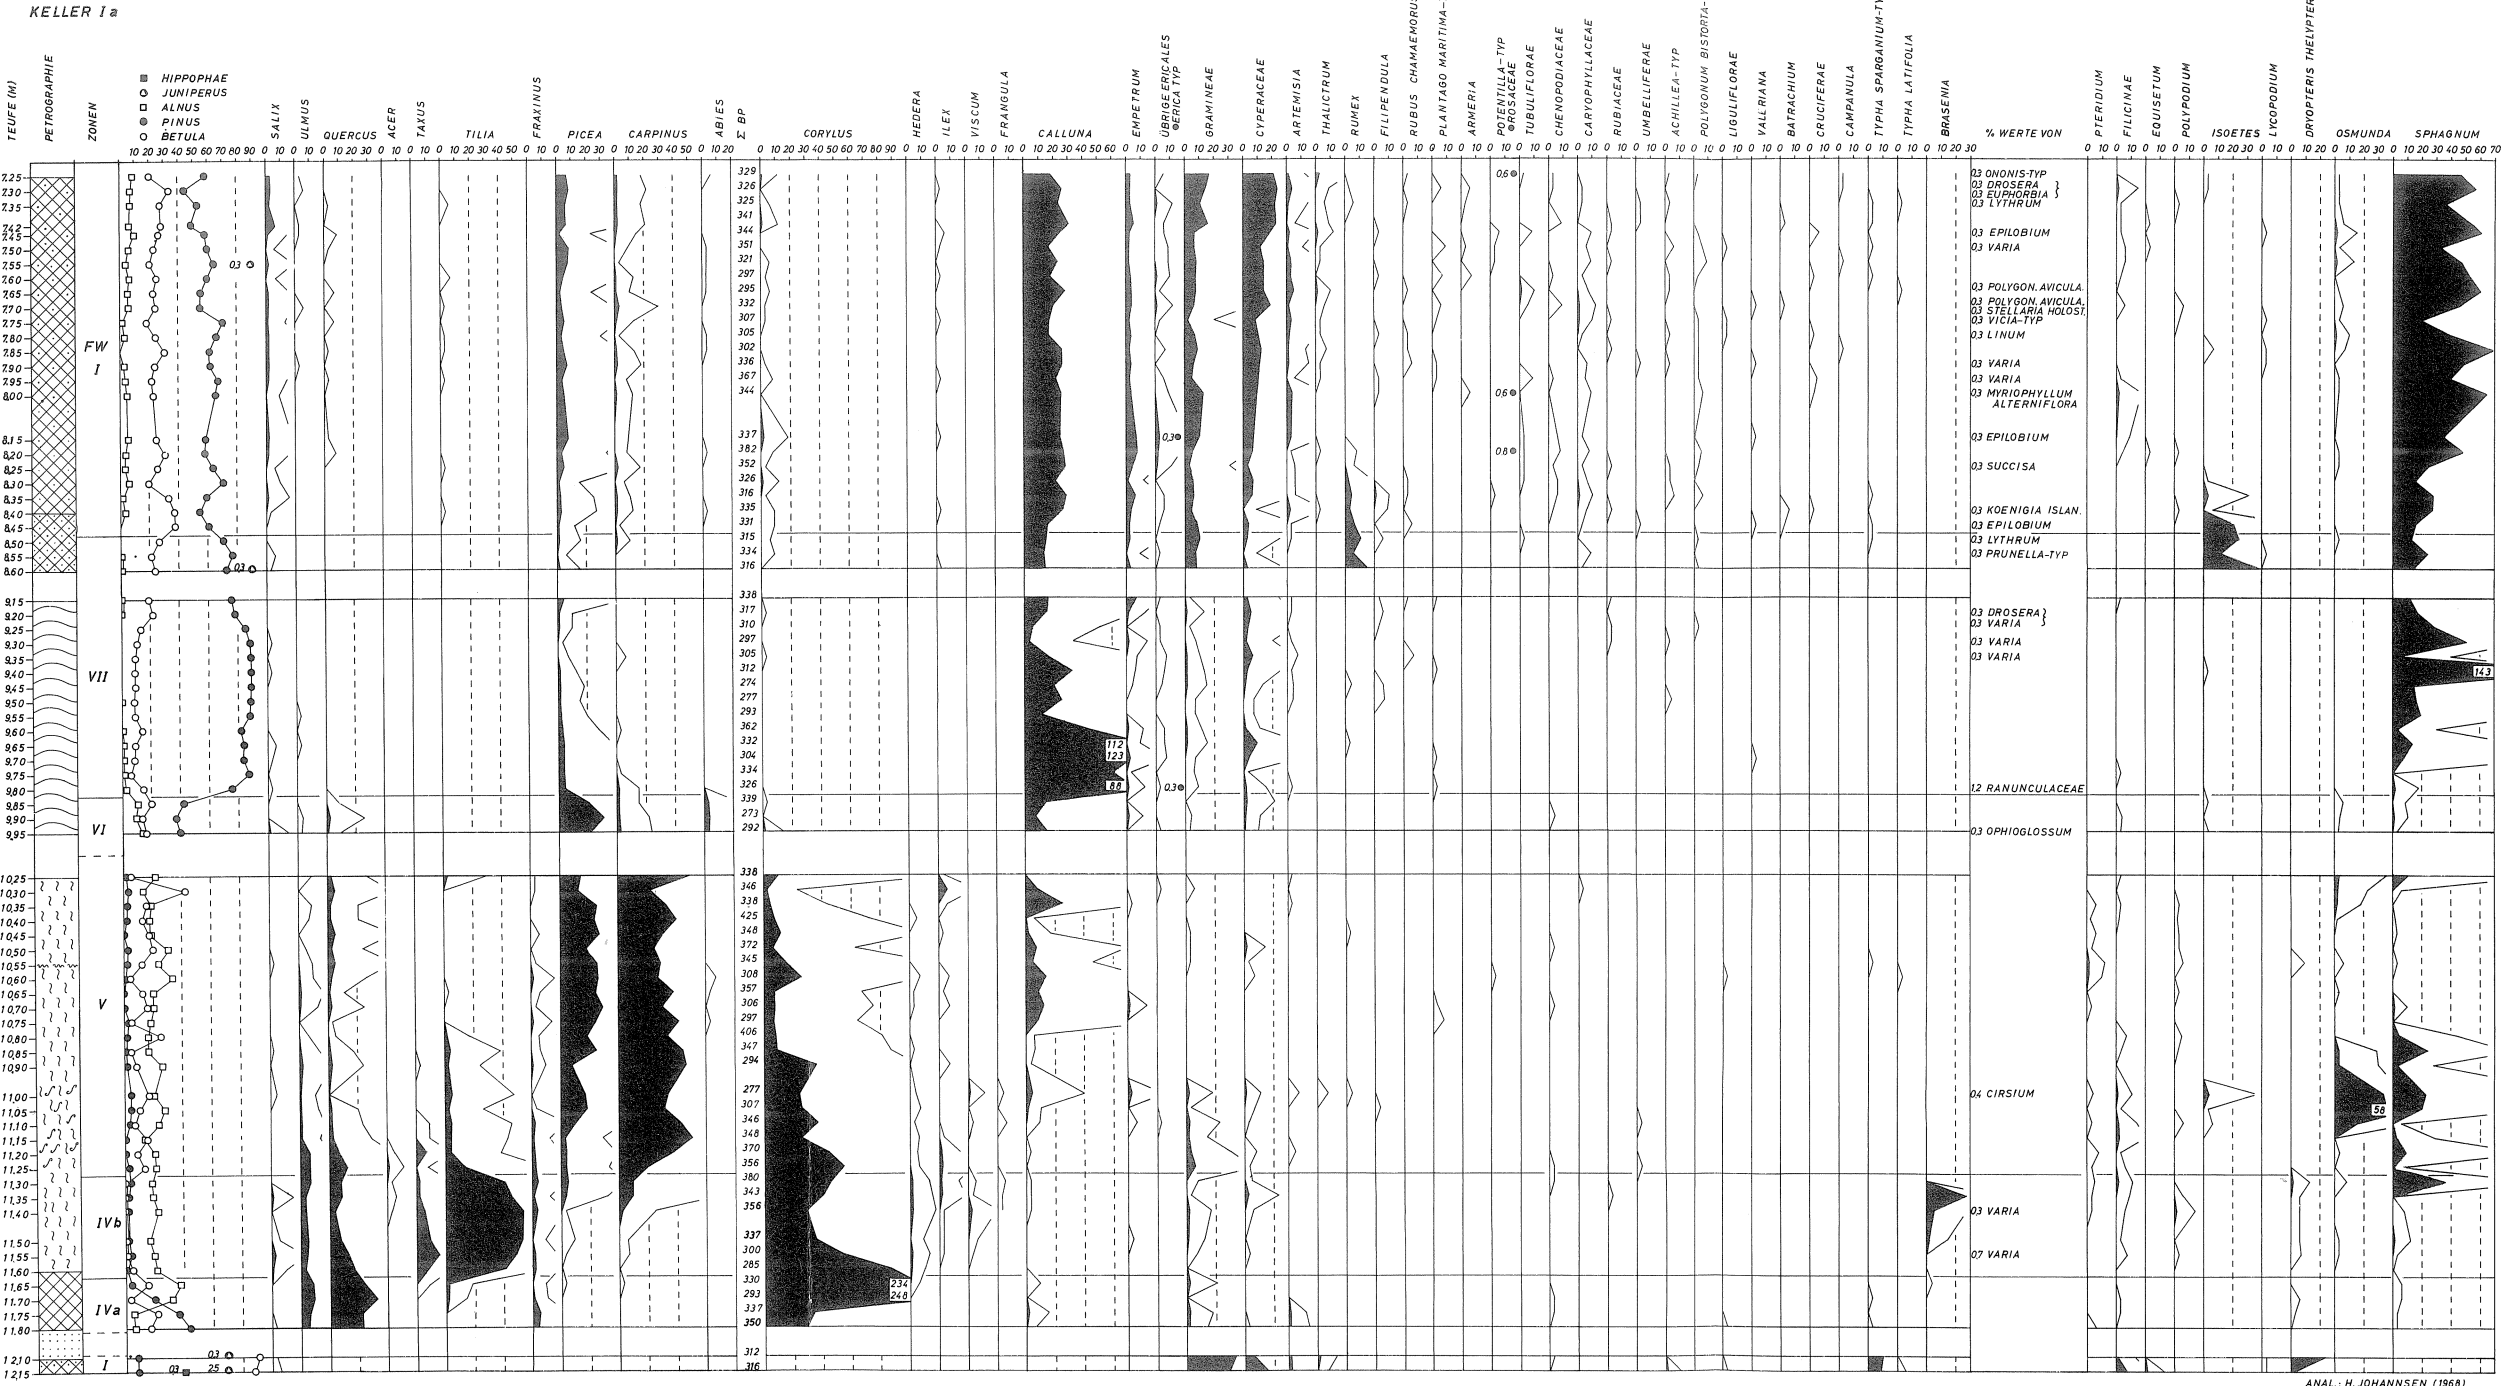

Supplement: Supplementary file 2 [file egqsj-21-5-1970-supplement.zip]
